# Supplementary material for: Influence of Co-adsorbates on CO2 induced phase transition in functionalized pillared-layered metal–organic frameworks
Source: Royal Society of Chemistry journal article supplement (doi:10.1039/c6ta03266d), 2016-01-01
Supplement: c6ta03266d1.pdf [file c6ta03266d1.pdf]

Supporting Information

# **Influence of Co-adsorbates on CO<sub>2</sub> Induced Phase Transition in Functionalized Pillared-Layered Metal-organic Frameworks**

Andreas Schneemann,<sup>a</sup> Yukiko Takahashi,<sup>b</sup> Robin Rudolf,<sup>a</sup> Shin-ichiro Noro,<sup>b\*</sup> and Roland A. Fischer<sup>a,c\*</sup>

<sup>a</sup> *Lehrstuhl für Anorganische Chemie II, Organometallics and Materials, Ruhr-Universität Bochum, Universitätsstr. 150, 44801 Bochum, Germany.*

<sup>b</sup> *Research Institute for Electronic Science, Hokkaido University, Sapporo 001-0020, Japan*

<sup>c</sup> *Chair of Inorganic and Metal-Organic Chemistry, Department of Chemistry, Technical University Munich, Lichtenbergstrasse 4, D-85748 Garching, Germany and Catalysis Research Centre, Technical University Munich, Ernst-Otto-Fischer Strasse 1, 85748 Garching, Germany*

## CONTENTS

|                                                                                                                                                        |    |
|--------------------------------------------------------------------------------------------------------------------------------------------------------|----|
| S1 PXRD Patterns.....                                                                                                                                  | 3  |
| S2 NMR Spectra.....                                                                                                                                    | 4  |
| S3 Infrared Spectroscopy.....                                                                                                                          | 6  |
| S4 Thermogravimetric Analysis .....                                                                                                                    | 7  |
| S5 Measurement Set Up.....                                                                                                                             | 8  |
| S6 Depiction of the Measurement Principle .....                                                                                                        | 9  |
| S7 Calculation of Selectivities for Equilibration Points 2-5.....                                                                                      | 10 |
| S8 CO <sub>2</sub> /C <sub>3</sub> H <sub>8</sub> Coadsorption Experiments.....                                                                        | 13 |
| S9 Physical Parameters of CO <sub>2</sub> , N <sub>2</sub> , CH <sub>4</sub> , C <sub>2</sub> H <sub>6</sub> , and C <sub>3</sub> H <sub>8</sub> ..... | 16 |
| S10 References .....                                                                                                                                   | 17 |

## S1 PXRD Patterns

Figure S1 shows the diffraction patterns of compounds **1-3** in the as-synthesized and dried state in a range from  $2\theta = 5-30^\circ$ .

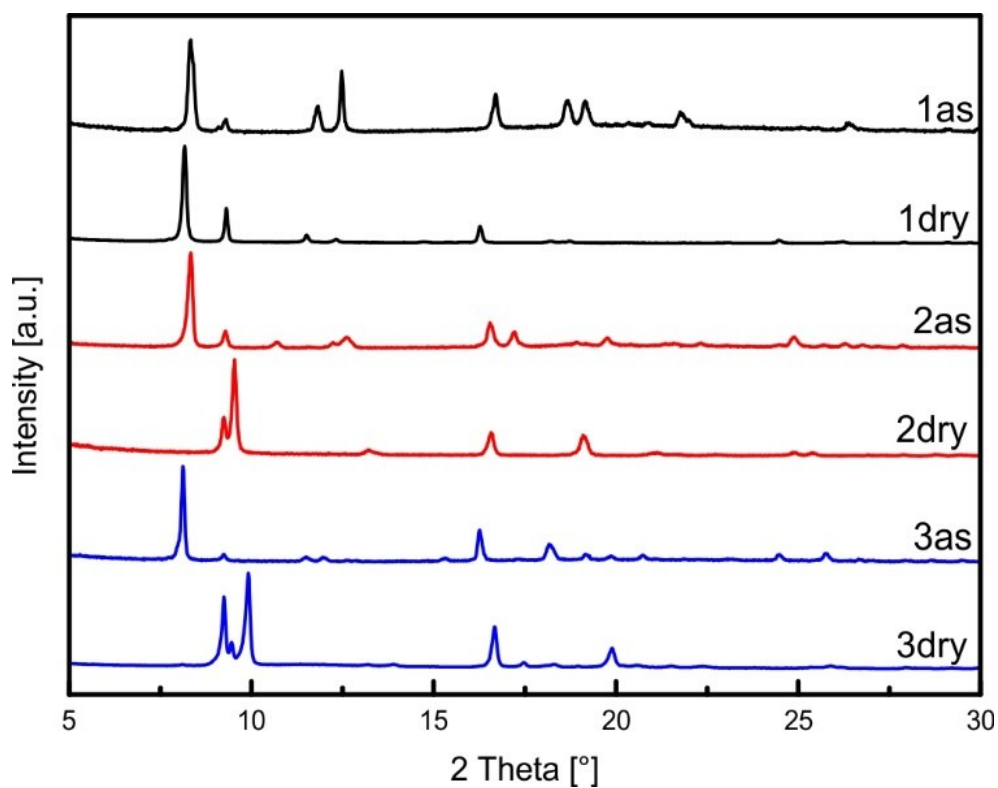

Figure S 1: PXRD patterns of compounds **1** (black), **2** (red) and **3** (blue) in the as-synthesized (as) and dried (dry) state.

## S2 NMR Spectra

Liquid phase NMR spectra were performed on a Bruker Advance DPX 200 spectrometer (1H, 200 MHz) at 293 K. <sup>1</sup>H NMR spectra of the synthesized linker molecules were recorded in DMSO-d<sub>6</sub> and the spectra of digested MOFs were recorded in 0.5 ml DMSO-d<sub>6</sub> and 0.05 ml of DCl/D<sub>2</sub>O (20%). Chemical shifts are given relative to TMS and were referenced to the solvent signals as internal standards.

Figures S2 – S4 show the <sup>1</sup>H-NMR of the MOFs **1-3** dissolved in DCl/D<sub>2</sub>O/DMSO-d<sub>6</sub>.

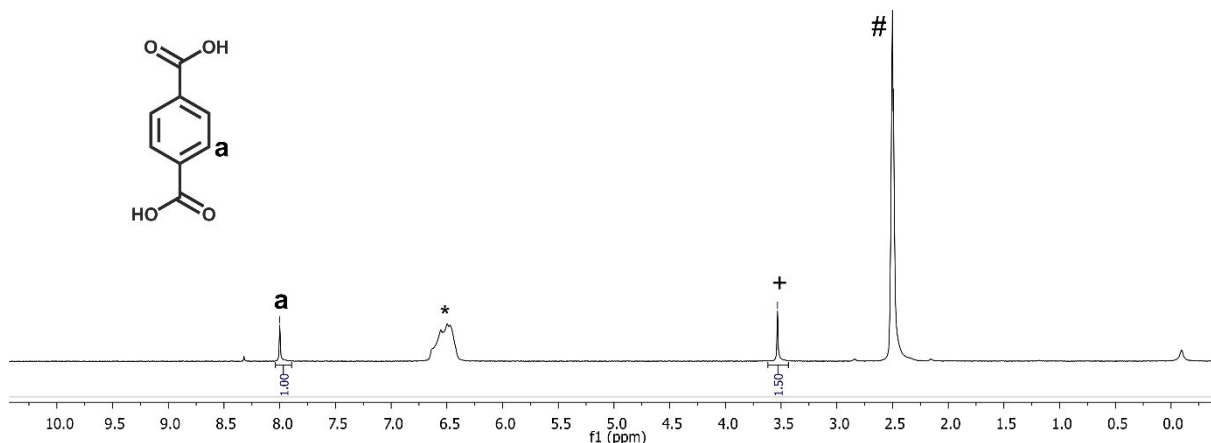

Figure S 2: NMR spectra of compound **1** ([Zn<sub>2</sub>(bdc)<sub>2</sub>(dabco)]<sub>n</sub>) measured in DMSO-d<sub>6</sub>/DCl/D<sub>2</sub>O. Asterisk marks the DCl/D<sub>2</sub>O peak, + the dabco peak and # the DMSO peak.

<sup>1</sup>H NMR (200 MHz, DMSO) δ 8.16 – 7.81 (s, 4H), 3.81 – 3.27 (s, 6H).

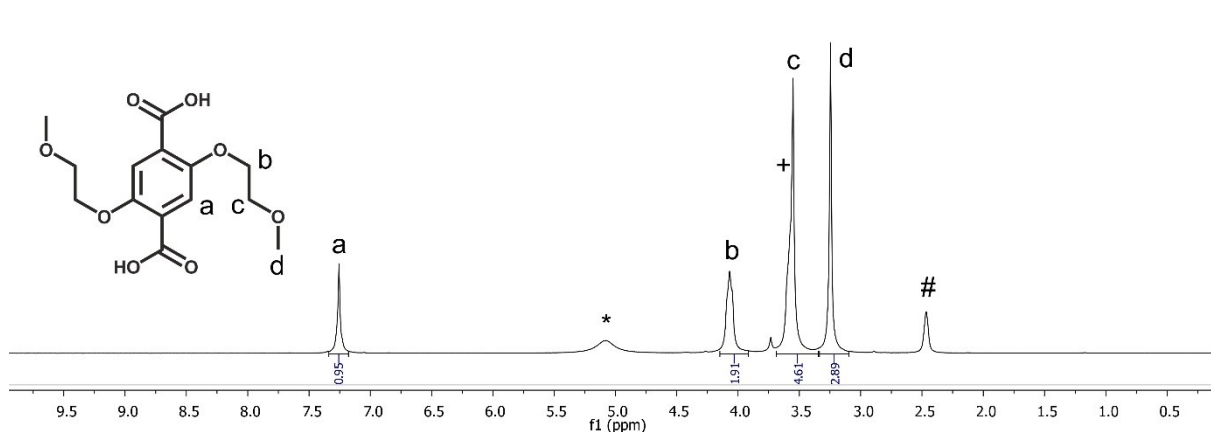

Figure S 3: NMR spectra of compound **2** ([Zn<sub>2</sub>(BME-bdc)<sub>2</sub>(dabco)]<sub>n</sub>) measured in DMSO-d<sub>6</sub>/DCl/D<sub>2</sub>O. Asterisk marks the DCl/D<sub>2</sub>O peak, + the dabco peak and # the DMSO peak.

<sup>1</sup>H NMR (200 MHz, DMSO) δ 7.62 – 7.09 (s, 1H), 4.44 – 3.89 (s, 1H), 3.69 – 3.41 (s, 5H), 3.44 – 3.01 (s, 3H).

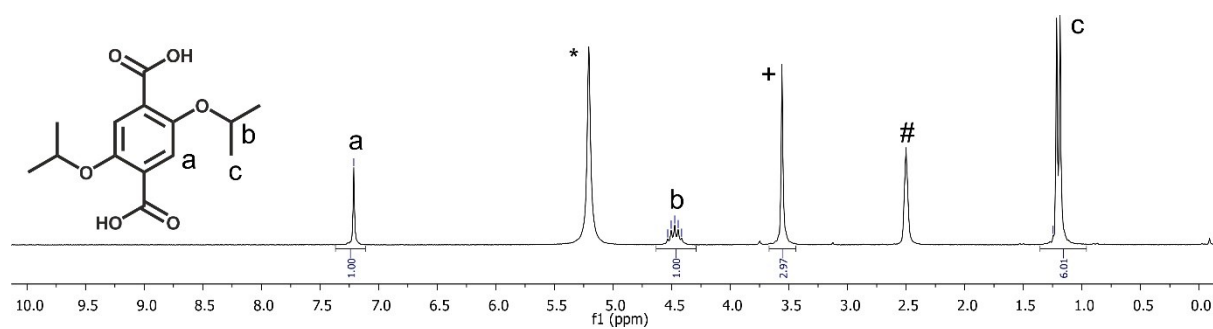

Figure S 4: NMR spectra of compound **3** ( $[\text{Zn}_2(\text{DiP-bdc})_2(\text{dabco})]_n$ ) measured in  $\text{DMSO-d}_6/\text{DCI}/\text{D}_2\text{O}$ . Asterisk marks the  $\text{DCI}/\text{D}_2\text{O}$  peak, + the dabco peak and # the DMSO peak.

$^1\text{H}$  NMR (200 MHz, DMSO)  $\delta$  7.21 (s, 1H), 4.47 (dt,  $J$  = 11.7, 5.9 Hz, 1H), 3.56 (s, 3H), 1.22 (t,  $J$  = 6.0 Hz, 6H).

### S3 Infrared Spectroscopy

Infrared spectra were recorded on a Bruker Alpha-P FT-IR situated in a glovebox. For all measurements the ATR-Mode of the spectrometer was used and measurements with 48 scans were performed.

The IR spectra of compounds **1dry**, **2dry** and **3dry** are shown in a range from 500-4000  $\text{cm}^{-1}$  in figure S5.

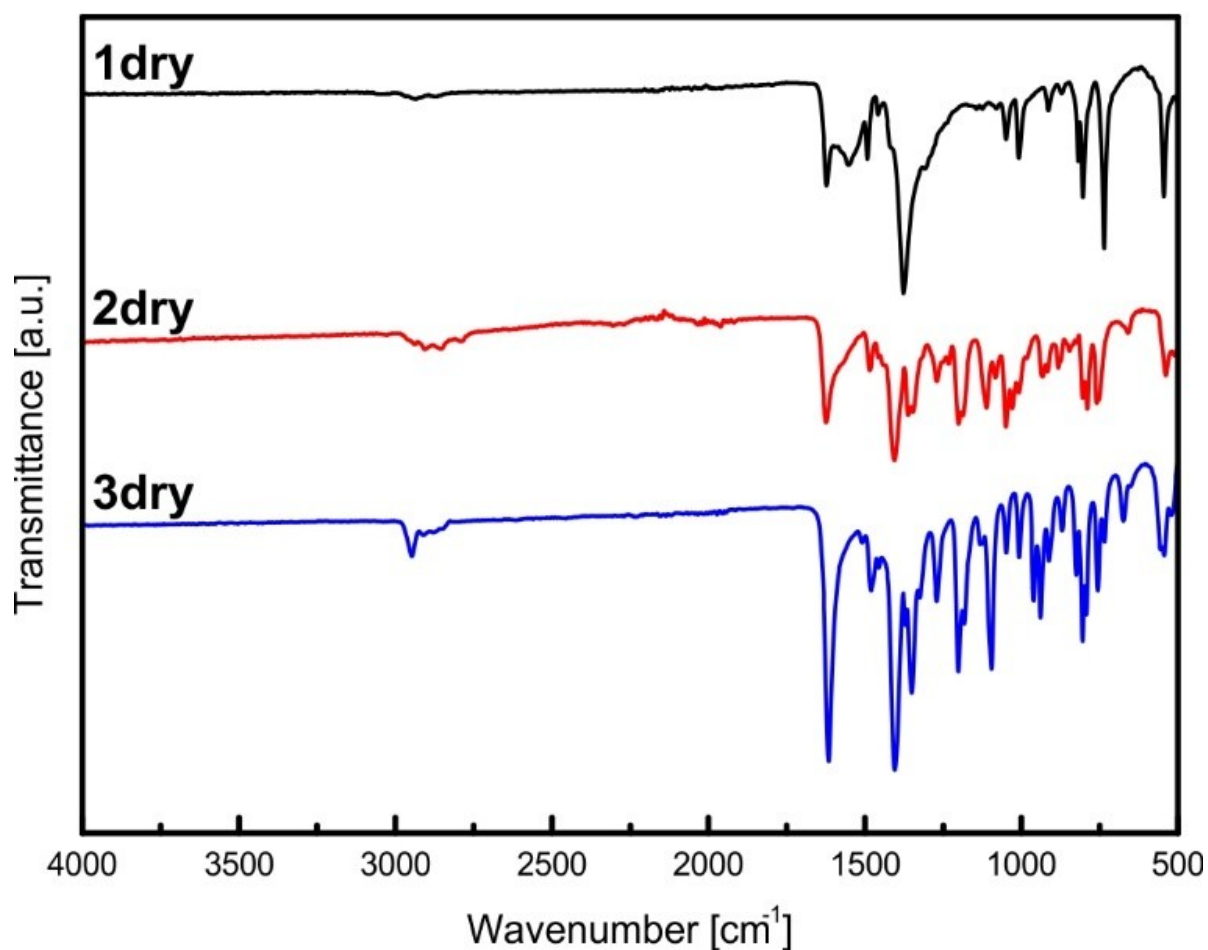

Figure S 5: Depiction of the IR Spectra of compounds **1dry** (black), **2dry** (red) and **3dry** (blue).

## S4 Thermogravimetric Analysis

All Thermogravimetric Analysis (TGs) were recorded on a Netzsch STA 409 PC TG-DSC apparatus. A Heating rate of 5 K/min was applied and the samples were placed in a pre-weighted, clean aluminiumoxide crucible. All measurements were performed in a stream of N<sub>2</sub> gas with constant flow rates of 20ml/min.

Figure S 6 shows the TG-traces of compounds **1-dry**, **2-dry** and **3-dry**.

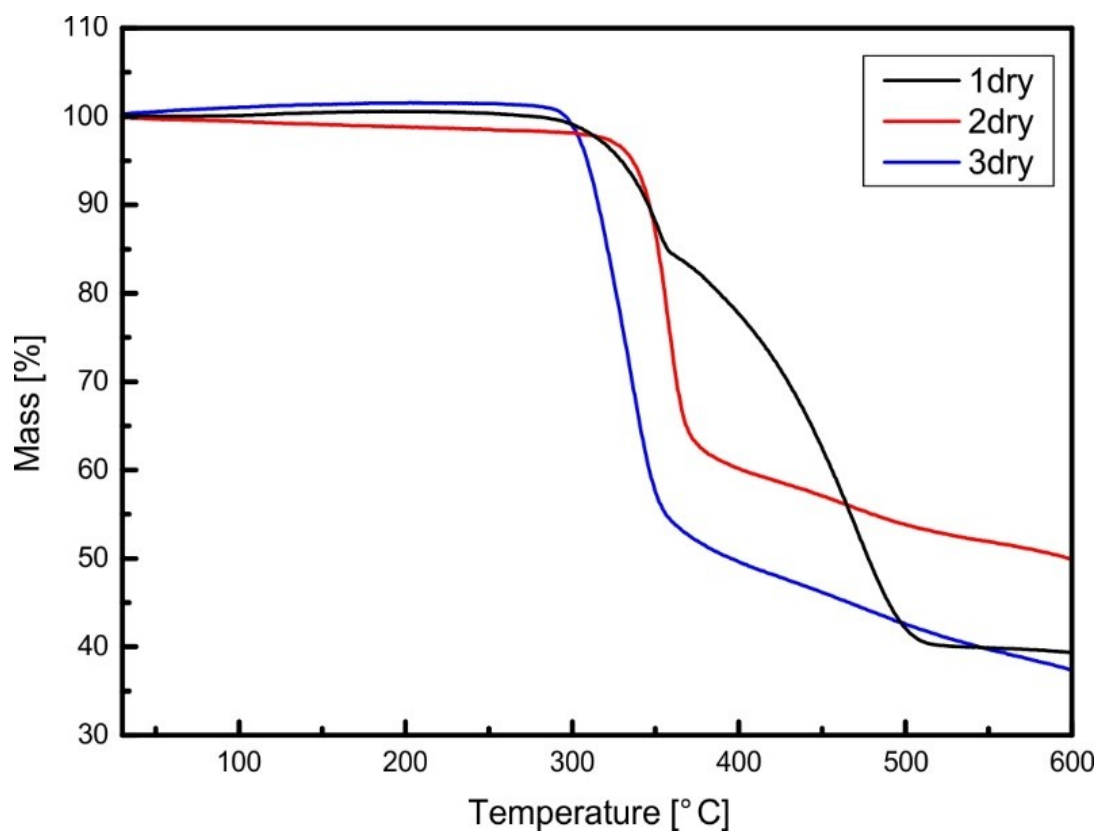

Figure S 6: TG traces of compounds **1dry** (black), **2dry** (red) and **3dry** (blue).

## S5 Measurement Set Up

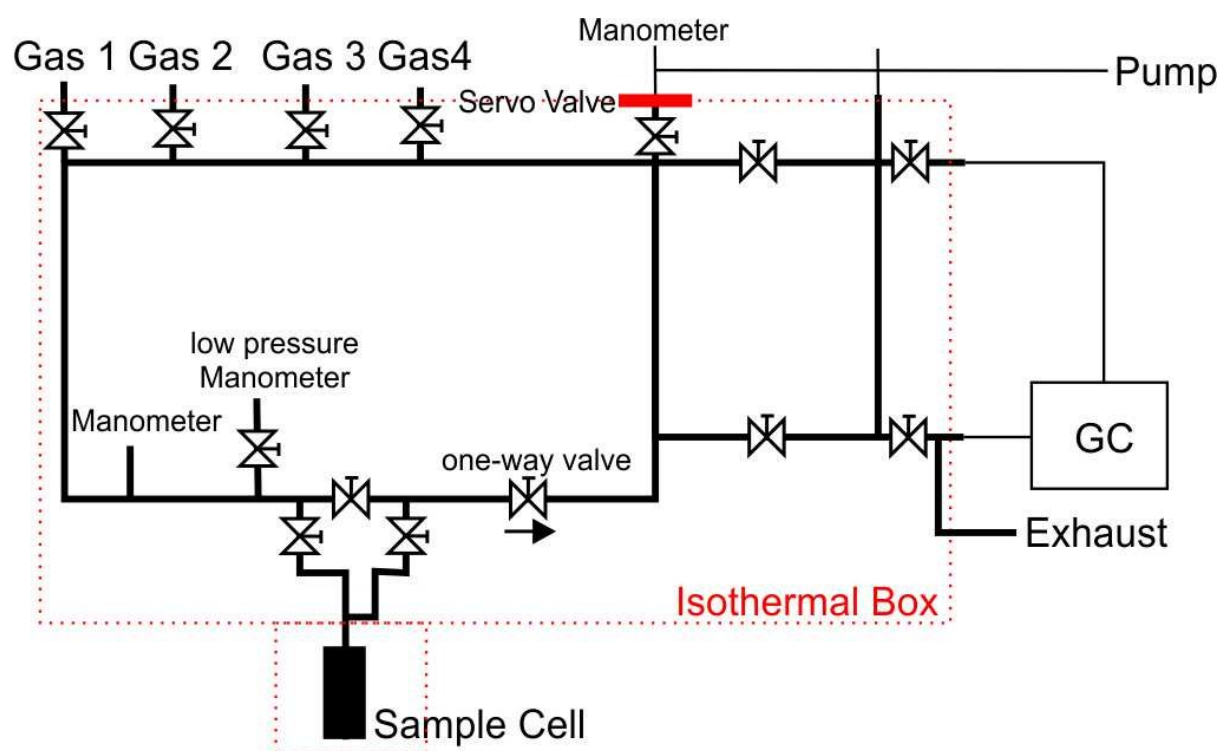

Figure S 7: Measurement set-up of the used Belsorp VC instrument



## S6 Depiction of the Measurement Principle

Both gases that are used in the co-adsorption experiment are stored in separate gas bottles (a). Both components of the mixture are introduced into the manifold (b), where they are mixed (c). After both gases have been mixed sufficiently, the mixture is introduced to the MOF (d). After equilibration parts of the gas mixture are adsorbed on the framework (e). Via GC a sample is taken from the gas phase remaining over the sample (f). From the composition of the gas phase which is determined by GC, the composition of the adsorbed gas can be calculated.

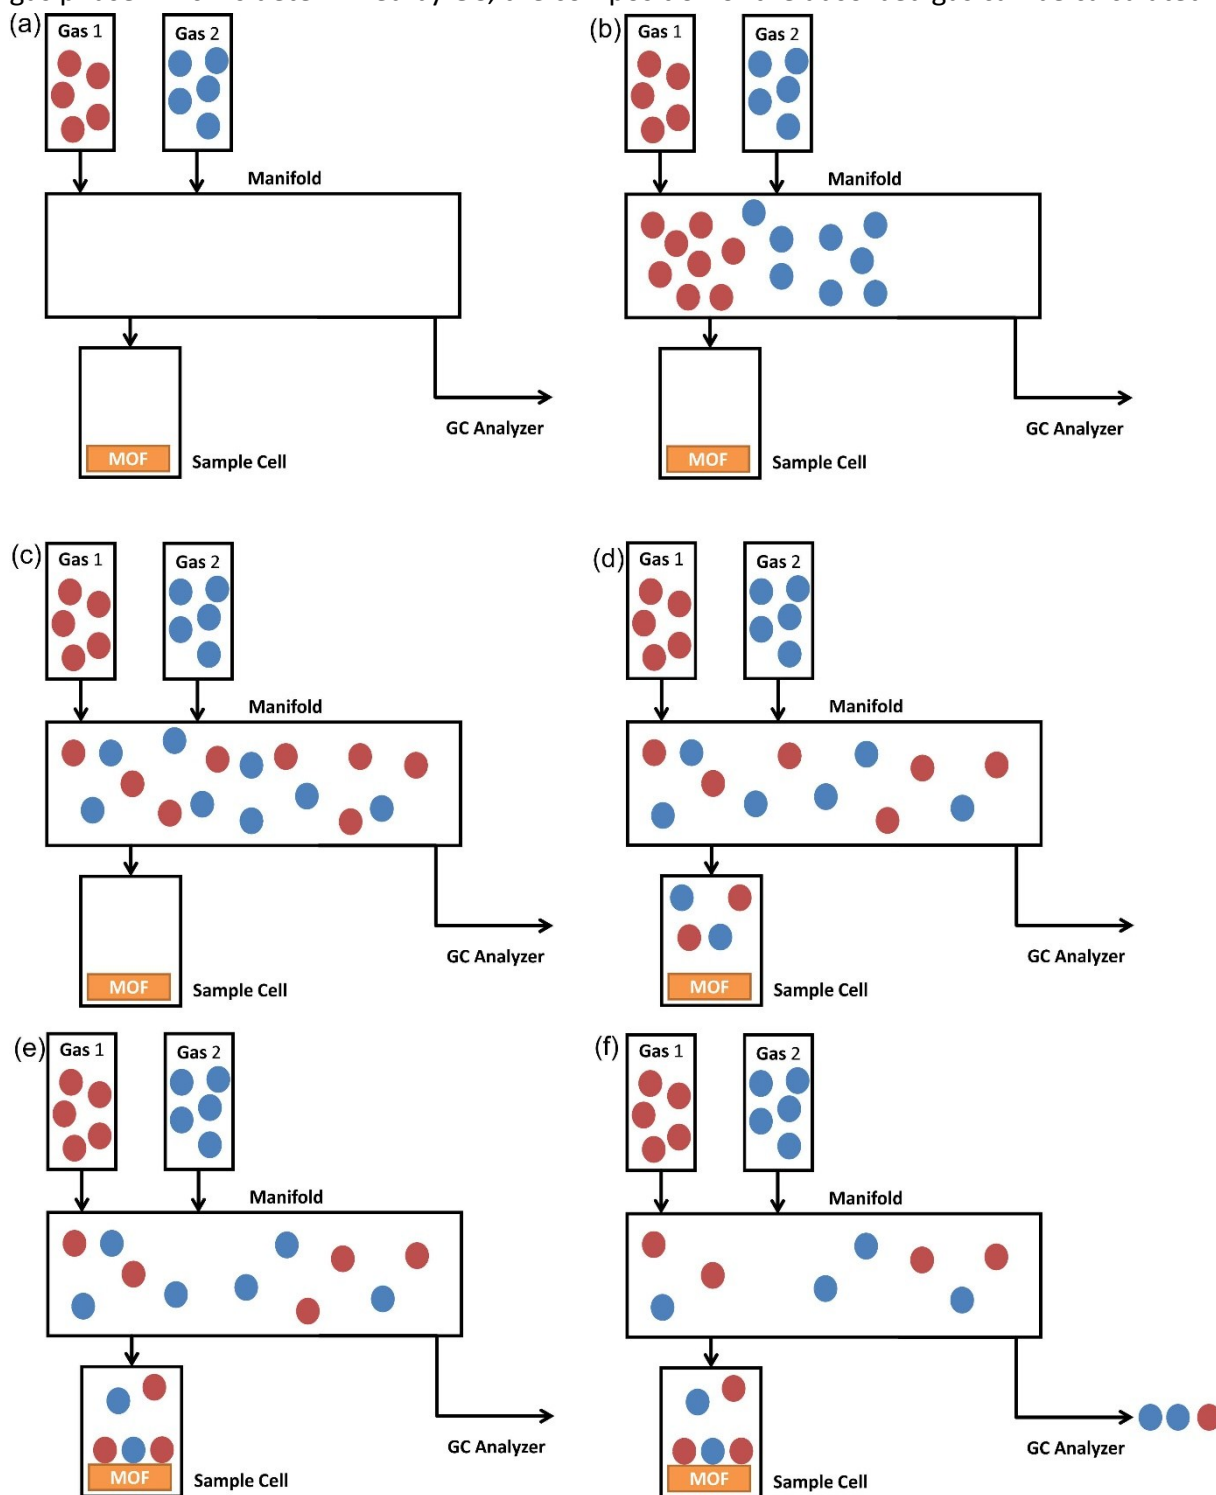

Figure S 8: Step by the depiction of the measurement principle.

## S7 Calculation of Selectivities for Equilibration Points 1-5

In the following the selectivity coefficients towards CO<sub>2</sub> and the coadsorbate for all measurement points are given.  $p_e$  is the equilibrium pressure in kPa at which the GC was sampled.

| Compound 1<br>Equilibration<br>Point | Gas Mixture                     | $p_e$  | Ratio in Gas Phase |             | Ratio Adsorbed  |             | Selectivity towards |             |
|--------------------------------------|---------------------------------|--------|--------------------|-------------|-----------------|-------------|---------------------|-------------|
|                                      |                                 |        | CO <sub>2</sub>    | Coadsorbate | CO <sub>2</sub> | Coadsorbate | CO <sub>2</sub>     | Coadsorbate |
| 1                                    | CO <sub>2</sub> /N <sub>2</sub> | 925.80 | 45.71%             | 54.29%      | 101.36%         | -1.36%      | -                   | -           |
| 2                                    | CO <sub>2</sub> /N <sub>2</sub> | 896.08 | 45.68%             | 54.32%      | 101.96%         | -1.96%      | -                   | -           |
| 3                                    | CO <sub>2</sub> /N <sub>2</sub> | 867.39 | 45.71%             | 54.29%      | 102.01%         | -2.01%      | -                   | -           |
| 4                                    | CO <sub>2</sub> /N <sub>2</sub> | 839.72 | 45.75%             | 54.25%      | 102.00%         | -2.00%      | -                   | -           |
| 5                                    | CO <sub>2</sub> /N <sub>2</sub> | 812.90 | 45.79%             | 54.21%      | 101.99%         | -1.99%      | -                   | -           |

| Compound 1<br>Equilibration<br>Point | Gas Mixture                      | $p_e$   | Ratio in Gas Phase |             | Ratio Adsorbed  |             | Selectivity towards |             |
|--------------------------------------|----------------------------------|---------|--------------------|-------------|-----------------|-------------|---------------------|-------------|
|                                      |                                  |         | CO <sub>2</sub>    | Coadsorbate | CO <sub>2</sub> | Coadsorbate | CO <sub>2</sub>     | Coadsorbate |
| 1                                    | CO <sub>2</sub> /CH <sub>4</sub> | 1323.90 | 52.02%             | 47.98%      | 14.02%          | 85.98%      | 0.15                | 6.65        |
| 2                                    | CO <sub>2</sub> /CH <sub>4</sub> | 1282.02 | 52.00%             | 48.00%      | 14.33%          | 85.67%      | 0.15                | 6.48        |
| 3                                    | CO <sub>2</sub> /CH <sub>4</sub> | 1242.35 | 51.97%             | 48.03%      | 14.51%          | 85.49%      | 0.16                | 6.38        |
| 4                                    | CO <sub>2</sub> /CH <sub>4</sub> | 1202.85 | 51.95%             | 48.05%      | 14.94%          | 85.06%      | 0.16                | 6.16        |
| 5                                    | CO <sub>2</sub> /CH <sub>4</sub> | 1164.35 | 51.92%             | 48.08%      | 15.49%          | 84.51%      | 0.17                | 5.89        |

| Compound 2<br>Equilibration<br>Point | Gas Mixture                     | $p_e$   | Ratio in Gas Phase |             | Ratio Adsorbed  |             | Selectivity towards: |             |
|--------------------------------------|---------------------------------|---------|--------------------|-------------|-----------------|-------------|----------------------|-------------|
|                                      |                                 |         | CO <sub>2</sub>    | Coadsorbate | CO <sub>2</sub> | Coadsorbate | CO <sub>2</sub>      | Coadsorbate |
| 1                                    | CO <sub>2</sub> /N <sub>2</sub> | 1975.71 | 49.48%             | 50.52%      | 141.46%         | -41.46%     | -                    | -           |
| 2                                    | CO <sub>2</sub> /N <sub>2</sub> | 1912.93 | 49.47%             | 50.53%      | 139.00%         | -39.00%     | -                    | -           |
| 3                                    | CO <sub>2</sub> /N <sub>2</sub> | 1852.35 | 49.46%             | 50.54%      | 138.61%         | -38.61%     | -                    | -           |
| 4                                    | CO <sub>2</sub> /N <sub>2</sub> | 1792.91 | 49.45%             | 50.55%      | 134.96%         | -34.96%     | -                    | -           |
| 5                                    | CO <sub>2</sub> /N <sub>2</sub> | 1735.52 | 49.45%             | 50.55%      | 132.35%         | -32.35%     | -                    | -           |

| Compound 2<br>Equilibration<br>Point | Gas Mixture                     | $p_e$   | Ratio in Gas Phase |             | Ratio Adsorbed  |             | Selectivity towards: |             |
|--------------------------------------|---------------------------------|---------|--------------------|-------------|-----------------|-------------|----------------------|-------------|
|                                      |                                 |         | CO <sub>2</sub>    | Coadsorbate | CO <sub>2</sub> | Coadsorbate | CO <sub>2</sub>      | Coadsorbate |
| 1                                    | CO <sub>2</sub> /N <sub>2</sub> | 2467.88 | 60.33%             | 39.67%      | 142.49%         | -42.49%     | -                    | -           |
| 2                                    | CO <sub>2</sub> /N <sub>2</sub> | 2392.05 | 60.32%             | 39.68%      | 137.13%         | -37.13%     | -                    | -           |
| 3                                    | CO <sub>2</sub> /N <sub>2</sub> | 2318.63 | 60.31%             | 39.69%      | 134.40%         | -34.40%     | -                    | -           |
| 4                                    | CO <sub>2</sub> /N <sub>2</sub> | 2246.85 | 60.30%             | 39.70%      | 130.71%         | -30.71%     | -                    | -           |
| 5                                    | CO <sub>2</sub> /N <sub>2</sub> | 2177.51 | 60.29%             | 39.71%      | 129.46%         | -29.46%     | -                    | -           |

| Compound 3<br>Equilibration<br>Point | Gas Mixture                     | $p_e$   | Ratio in Gas Phase |             | Ratio Adsorbed  |             | Selectivity towards: |             |
|--------------------------------------|---------------------------------|---------|--------------------|-------------|-----------------|-------------|----------------------|-------------|
|                                      |                                 |         | CO <sub>2</sub>    | Coadsorbate | CO <sub>2</sub> | Coadsorbate | CO <sub>2</sub>      | Coadsorbate |
| 1                                    | CO <sub>2</sub> /N <sub>2</sub> | 1328.59 | 47.02%             | 52.98%      | 100.40%         | -0.40%      | -                    | -           |
| 2                                    | CO <sub>2</sub> /N <sub>2</sub> | 1285.32 | 46.95%             | 53.05%      | 101.20%         | -1.20%      | -                    | -           |
| 3                                    | CO <sub>2</sub> /N <sub>2</sub> | 1243.33 | 46.89%             | 53.11%      | 101.82%         | -1.82%      | -                    | -           |
| 4                                    | CO <sub>2</sub> /N <sub>2</sub> | 1202.99 | 46.86%             | 53.14%      | 102.19%         | -2.19%      | -                    | -           |
| 5                                    | CO <sub>2</sub> /N <sub>2</sub> | 1164.03 | 46.84%             | 53.16%      | 102.44%         | -2.44%      | -                    | -           |

| Compound 3<br>Equilibration<br>Point | Gas Mixture                     | $p_e$   | Ratio in Gas Phase |             | Ratio Adsorbed  |             | Selectivity towards |             |
|--------------------------------------|---------------------------------|---------|--------------------|-------------|-----------------|-------------|---------------------|-------------|
|                                      |                                 |         | CO <sub>2</sub>    | Coadsorbate | CO <sub>2</sub> | Coadsorbate | CO <sub>2</sub>     | Coadsorbate |
| 1                                    | CO <sub>2</sub> /N <sub>2</sub> | 1347.56 | 21.56%             | 78.44%      | 117.68%         | -17.68%     | -                   | -           |
| 2                                    | CO <sub>2</sub> /N <sub>2</sub> | 1302.88 | 21.54%             | 78.46%      | 114.20%         | -14.20%     | -                   | -           |
| 3                                    | CO <sub>2</sub> /N <sub>2</sub> | 1259.97 | 21.54%             | 78.46%      | 112.85%         | -12.85%     | -                   | -           |
| 4                                    | CO <sub>2</sub> /N <sub>2</sub> | 1218.12 | 21.54%             | 78.46%      | 108.59%         | -8.59%      | -                   | -           |
| 5                                    | CO <sub>2</sub> /N <sub>2</sub> | 1177.80 | 21.55%             | 78.45%      | 104.20%         | -4.20%      | -                   | -           |

| Compound 3<br>Equilibration<br>Point | Gas Mixture                      | $p_e$   | Ratio in Gas Phase |             | Ratio Adsorbed  |             | Selectivity towards |             |
|--------------------------------------|----------------------------------|---------|--------------------|-------------|-----------------|-------------|---------------------|-------------|
|                                      |                                  |         | CO <sub>2</sub>    | Coadsorbate | CO <sub>2</sub> | Coadsorbate | CO <sub>2</sub>     | Coadsorbate |
| 1                                    | CO <sub>2</sub> /CH <sub>4</sub> | 1323.98 | 51.95%             | 48.05%      | 15.61%          | 84.39%      | 0.17                | 5.85        |
| 2                                    | CO <sub>2</sub> /CH <sub>4</sub> | 1281.48 | 52.01%             | 47.99%      | 14.89%          | 85.11%      | 0.16                | 6.19        |
| 3                                    | CO <sub>2</sub> /CH <sub>4</sub> | 1240.65 | 52.02%             | 47.98%      | 14.72%          | 85.28%      | 0.16                | 6.28        |
| 4                                    | CO <sub>2</sub> /CH <sub>4</sub> | 1201.09 | 52.03%             | 47.97%      | 14.67%          | 85.33%      | 0.16                | 6.31        |
| 5                                    | CO <sub>2</sub> /CH <sub>4</sub> | 1163.00 | 52.03%             | 47.97%      | 14.61%          | 85.39%      | 0.16                | 6.34        |

| Compound 3<br>Equilibration<br>Point | Gas Mixture                      | $p_e$   | Ratio in Gas Phase |             | Ratio Adsorbed  |             | Selectivity towards |             |
|--------------------------------------|----------------------------------|---------|--------------------|-------------|-----------------|-------------|---------------------|-------------|
|                                      |                                  |         | CO <sub>2</sub>    | Coadsorbate | CO <sub>2</sub> | Coadsorbate | CO <sub>2</sub>     | Coadsorbate |
| 1                                    | CO <sub>2</sub> /CH <sub>4</sub> | 1167.08 | 23.69%             | 76.31%      | 78.51%          | 21.49%      | 11.77               | 0.08        |
| 2                                    | CO <sub>2</sub> /CH <sub>4</sub> | 1128.89 | 23.67%             | 76.33%      | 78.14%          | 21.86%      | 11.52               | 0.09        |
| 3                                    | CO <sub>2</sub> /CH <sub>4</sub> | 1092.21 | 23.65%             | 76.35%      | 78.45%          | 21.55%      | 11.75               | 0.09        |
| 4                                    | CO <sub>2</sub> /CH <sub>4</sub> | 1056.44 | 23.64%             | 76.36%      | 78.10%          | 21.90%      | 11.52               | 0.09        |
| 5                                    | CO <sub>2</sub> /CH <sub>4</sub> | 1022.42 | 23.64%             | 76.36%      | 78.14%          | 21.86%      | 11.55               | 0.09        |

| Compound 3<br>Equilibration<br>Point | Gas Mixture                                    | $p_e$  | Ratio in Gas Phase |             | Ratio Adsorbed  |             | Selectivity towards |             |
|--------------------------------------|------------------------------------------------|--------|--------------------|-------------|-----------------|-------------|---------------------|-------------|
|                                      |                                                |        | CO <sub>2</sub>    | Coadsorbate | CO <sub>2</sub> | Coadsorbate | CO <sub>2</sub>     | Coadsorbate |
| 1                                    | CO <sub>2</sub> /C <sub>2</sub> H <sub>6</sub> | 336.52 | 73.84%             | 26.16%      | 67.89%          | 32.11%      | 0.75                | 1.33        |
| 2                                    | CO <sub>2</sub> /C <sub>2</sub> H <sub>6</sub> | 325.20 | 73.96%             | 26.04%      | 66.91%          | 33.09%      | 0.71                | 1.40        |
| 3                                    | CO <sub>2</sub> /C <sub>2</sub> H <sub>6</sub> | 314.56 | 74.10%             | 25.90%      | 65.74%          | 34.26%      | 0.67                | 1.49        |
| 4                                    | CO <sub>2</sub> /C <sub>2</sub> H <sub>6</sub> | 304.53 | 74.37%             | 25.63%      | 63.50%          | 36.50%      | 0.60                | 1.67        |
| 5                                    | CO <sub>2</sub> /C <sub>2</sub> H <sub>6</sub> | 294.69 | 74.35%             | 25.65%      | 63.64%          | 36.36%      | 0.60                | 1.66        |

| Compound 3<br>Equilibration<br>Point | Gas Mixture                                    | $p_e$  | Ratio in Gas Phase |             | Ratio Adsorbed  |             | Selectivity towards: |             |
|--------------------------------------|------------------------------------------------|--------|--------------------|-------------|-----------------|-------------|----------------------|-------------|
|                                      |                                                |        | CO <sub>2</sub>    | Coadsorbate | CO <sub>2</sub> | Coadsorbate | CO <sub>2</sub>      | Coadsorbate |
| 1                                    | CO <sub>2</sub> /C <sub>2</sub> H <sub>6</sub> | 511.79 | 47.64%             | 52.36%      | 48.20%          | 51.80%      | 1.02                 | 0.98        |
| 2                                    | CO <sub>2</sub> /C <sub>2</sub> H <sub>6</sub> | 495.16 | 47.82%             | 52.18%      | 46.80%          | 53.20%      | 0.96                 | 1.04        |
| 3                                    | CO <sub>2</sub> /C <sub>2</sub> H <sub>6</sub> | 479.67 | 48.00%             | 52.00%      | 45.36%          | 54.64%      | 0.90                 | 1.11        |
| 4                                    | CO <sub>2</sub> /C <sub>2</sub> H <sub>6</sub> | 464.57 | 48.15%             | 51.85%      | 44.18%          | 55.82%      | 0.85                 | 1.17        |
| 5                                    | CO <sub>2</sub> /C <sub>2</sub> H <sub>6</sub> | 449.98 | 48.28%             | 51.72%      | 43.24%          | 56.76%      | 0.82                 | 1.23        |

| Compound 3<br>Equilibration<br>Point | Gas Mixture                                    | $p_e$  | Ratio in Gas Phase |             | Ratio Adsorbed  |             | Selectivity towards: |             |
|--------------------------------------|------------------------------------------------|--------|--------------------|-------------|-----------------|-------------|----------------------|-------------|
|                                      |                                                |        | CO <sub>2</sub>    | Coadsorbate | CO <sub>2</sub> | Coadsorbate | CO <sub>2</sub>      | Coadsorbate |
| 1                                    | CO <sub>2</sub> /C <sub>2</sub> H <sub>6</sub> | 630.01 | 86.62%             | 14.40%      | 86.08%          | 13.92%      | 1.03                 | 0.97        |
| 2                                    | CO <sub>2</sub> /C <sub>2</sub> H <sub>6</sub> | 609.47 | 86.72%             | 14.26%      | 86.20%          | 13.80%      | 1.03                 | 0.97        |
| 3                                    | CO <sub>2</sub> /C <sub>2</sub> H <sub>6</sub> | 590.09 | 86.80%             | 14.14%      | 86.30%          | 13.70%      | 1.03                 | 0.97        |
| 4                                    | CO <sub>2</sub> /C <sub>2</sub> H <sub>6</sub> | 571.48 | 86.88%             | 14.02%      | 86.40%          | 13.60%      | 1.03                 | 0.98        |
| 5                                    | CO <sub>2</sub> /C <sub>2</sub> H <sub>6</sub> | 553.24 | 86.95%             | 13.91%      | 86.49%          | 13.51%      | 1.02                 | 0.98        |

| Compound 3<br>Equilibration<br>Point | Gas Mixture                                    | $p_e$  | Ratio in Gas Phase |             | Ratio Adsorbed  |             | Selectivity towards |             |
|--------------------------------------|------------------------------------------------|--------|--------------------|-------------|-----------------|-------------|---------------------|-------------|
|                                      |                                                |        | CO <sub>2</sub>    | Coadsorbate | CO <sub>2</sub> | Coadsorbate | CO <sub>2</sub>     | Coadsorbate |
| 1                                    | CO <sub>2</sub> /C <sub>3</sub> H <sub>8</sub> | 286.63 | 98.01%             | 1.99%       | 87.17%          | 12.83%      | 0.14                | 7.25        |
| 2                                    | CO <sub>2</sub> /C <sub>3</sub> H <sub>8</sub> | 276.95 | 98.05%             | 1.95%       | 86.89%          | 13.11%      | 0.13                | 7.57        |
| 3                                    | CO <sub>2</sub> /C <sub>3</sub> H <sub>8</sub> | 267.63 | 98.09%             | 1.91%       | 86.45%          | 13.55%      | 0.12                | 8.06        |
| 4                                    | CO <sub>2</sub> /C <sub>3</sub> H <sub>8</sub> | 258.89 | 98.13%             | 1.87%       | 85.95%          | 14.05%      | 0.12                | 8.60        |
| 5                                    | CO <sub>2</sub> /C <sub>3</sub> H <sub>8</sub> | 250.49 | 98.17%             | 1.83%       | 85.49%          | 14.51%      | 0.11                | 9.10        |

| Compound 3<br>Equilibration<br>Point | Gas Mixture                                    | $p_e$  | Ratio in Gas Phase |             | Ratio Adsorbed  |             | Selectivity towards: |             |
|--------------------------------------|------------------------------------------------|--------|--------------------|-------------|-----------------|-------------|----------------------|-------------|
|                                      |                                                |        | CO <sub>2</sub>    | Coadsorbate | CO <sub>2</sub> | Coadsorbate | CO <sub>2</sub>      | Coadsorbate |
| 1                                    | CO <sub>2</sub> /C <sub>3</sub> H <sub>8</sub> | 299.25 | 92.45%             | 7.55%       | 77.59%          | 22.41%      | 0.28                 | 3.54        |
| 2                                    | CO <sub>2</sub> /C <sub>3</sub> H <sub>8</sub> | 289.08 | 92.56%             | 7.44%       | 76.75%          | 23.25%      | 0.27                 | 3.77        |
| 3                                    | CO <sub>2</sub> /C <sub>3</sub> H <sub>8</sub> | 279.20 | 92.76%             | 7.24%       | 75.22%          | 24.78%      | 0.24                 | 4.22        |
| 4                                    | CO <sub>2</sub> /C <sub>3</sub> H <sub>8</sub> | 270.07 | 92.96%             | 7.04%       | 73.58%          | 26.42%      | 0.21                 | 4.74        |
| 5                                    | CO <sub>2</sub> /C <sub>3</sub> H <sub>8</sub> | 261.36 | 93.18%             | 6.82%       | 71.64%          | 28.36%      | 0.18                 | 5.41        |

| Compound 3<br>Equilibration<br>Point | Gas Mixture                                    | $p_e$  | Ratio in Gas Phase |             | Ratio Adsorbed  |             | Selectivity towards: |             |
|--------------------------------------|------------------------------------------------|--------|--------------------|-------------|-----------------|-------------|----------------------|-------------|
|                                      |                                                |        | CO <sub>2</sub>    | Coadsorbate | CO <sub>2</sub> | Coadsorbate | CO <sub>2</sub>      | Coadsorbate |
| 1                                    | CO <sub>2</sub> /C <sub>3</sub> H <sub>8</sub> | 540.17 | 98.76%             | 1.24%       | 98.35%          | 1.65%       | 0.75                 | 1.33        |
| 2                                    | CO <sub>2</sub> /C <sub>3</sub> H <sub>8</sub> | 522.77 | 98.78%             | 1.22%       | 98.23%          | 1.77%       | 0.69                 | 1.46        |
| 3                                    | CO <sub>2</sub> /C <sub>3</sub> H <sub>8</sub> | 506.03 | 98.80%             | 1.20%       | 98.06%          | 1.94%       | 0.61                 | 1.63        |
| 4                                    | CO <sub>2</sub> /C <sub>3</sub> H <sub>8</sub> | 489.93 | 98.83%             | 1.17%       | 97.85%          | 2.15%       | 0.54                 | 1.86        |
| 5                                    | CO <sub>2</sub> /C <sub>3</sub> H <sub>8</sub> | 474.36 | 98.86%             | 1.14%       | 97.62%          | 2.38%       | 0.47                 | 2.11        |

| Compound 3<br>Equilibration<br>Point | Gas Mixture                                    | $p_e$  | Ratio in Gas Phase |             | Ratio Adsorbed  |             | Selectivity towards |             |
|--------------------------------------|------------------------------------------------|--------|--------------------|-------------|-----------------|-------------|---------------------|-------------|
|                                      |                                                |        | CO <sub>2</sub>    | Coadsorbate | CO <sub>2</sub> | Coadsorbate | CO <sub>2</sub>     | Coadsorbate |
| 1                                    | CO <sub>2</sub> /C <sub>3</sub> H <sub>8</sub> | 568.01 | 95.35%             | 4.65%       | 94.35%          | 5.65%       | 0.81                | 1.23        |
| 2                                    | CO <sub>2</sub> /C <sub>3</sub> H <sub>8</sub> | 549.76 | 95.41%             | 4.59%       | 93.79%          | 6.21%       | 0.73                | 1.38        |
| 3                                    | CO <sub>2</sub> /C <sub>3</sub> H <sub>8</sub> | 532.24 | 95.49%             | 4.51%       | 93.12%          | 6.88%       | 0.64                | 1.56        |
| 4                                    | CO <sub>2</sub> /C <sub>3</sub> H <sub>8</sub> | 515.44 | 95.62%             | 4.38%       | 92.00%          | 8.00%       | 0.53                | 1.90        |
| 5                                    | CO <sub>2</sub> /C <sub>3</sub> H <sub>8</sub> | 499.18 | 95.71%             | 4.29%       | 91.31%          | 8.69%       | 0.47                | 2.12        |

## S8 CO<sub>2</sub>/C<sub>3</sub>H<sub>8</sub> Coadsorption Experiments

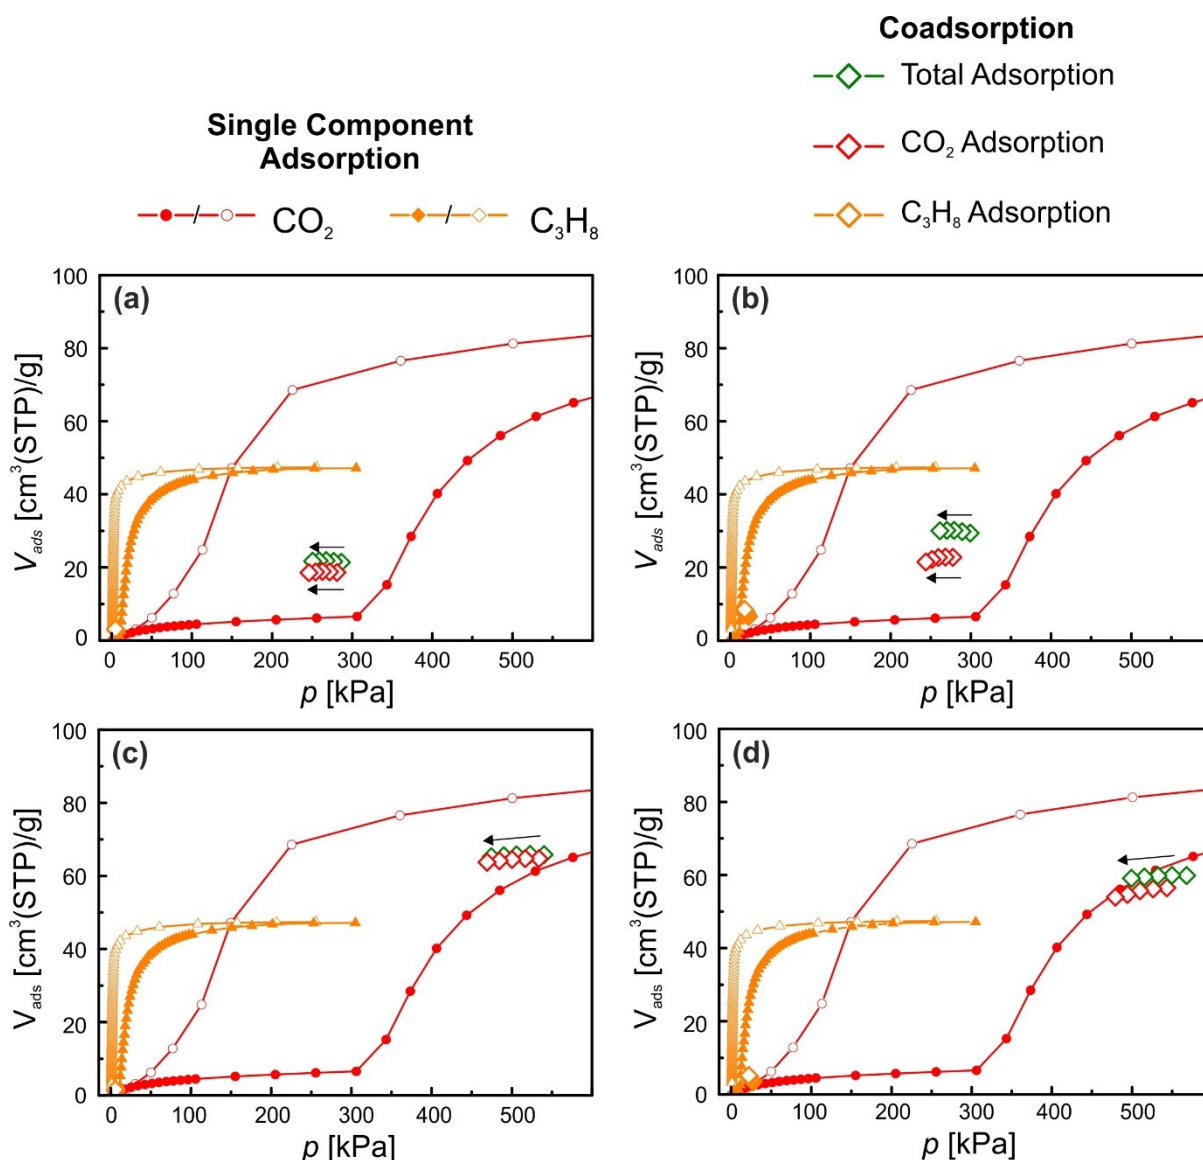

Figure S9: Depiction of the excess single component and co-adsorption measurements of material **3**. Red circles and orange triangles represent CO<sub>2</sub> and C<sub>3</sub>H<sub>8</sub> single component adsorption isotherms. CO<sub>2</sub> and C<sub>3</sub>H<sub>8</sub> fractions of the co-adsorption experiments are shown in red and orange, respectively. Total adsorption is shown in green.

The last set of experiments was conducted for gas mixtures containing CO<sub>2</sub>/C<sub>3</sub>H<sub>8</sub> ratios of 281:6 kPa, 277:23 kPa, 534:6 kPa and 544: 27 kPa (Figure S9 (a-d)). The observations made are similar to the ones found for the CO<sub>2</sub>/C<sub>2</sub>H<sub>6</sub> mixtures. Due to the relatively low phase transition pressure and operating pressures of C<sub>3</sub>H<sub>8</sub>, the scale of the graph was decreased and the isotherms are only shown from 0 to 600 kPa. During the first measurement shown in Figure S9(a), both partial pressures are lower than the respective phase transition pressures. Again, a cooperative effect of the two gases is observed and the uptakes are increased to 18.6 and 2.74 cm<sup>3</sup>(STP)/g for CO<sub>2</sub> and C<sub>3</sub>H<sub>8</sub> respectively as compared to 6.5 and 1.4 cm<sup>3</sup>(STP)/g during single component adsorption. When the partial C<sub>3</sub>H<sub>8</sub> pressure is increased to exceed the threshold pressure of the **np**→**lp** transition (Figure S9(b)), an even more striking uptake of CO<sub>2</sub> is achieved amounting to 22.81 cm<sup>3</sup>(STP)/g. In contrast, the C<sub>3</sub>H<sub>8</sub> adsorption is even lower than the values determined from the single component adsorption isotherm at similar C<sub>3</sub>H<sub>8</sub> pressures (6.6 cm<sup>3</sup>(STP)/g at

the first equilibration step, compared to 25.1 (STP)/g during single component adsorption at similar pressures). If the partial  $\text{CO}_2$  pressure surpasses the threshold pressure of the phase transition (Figure S9(c)), it can be observed that the uptake of the  $\text{CO}_2$  portion of the mixture is comparably high as for the single component adsorption at this pressure (64.7  $\text{cm}^3(\text{STP})/\text{g}$ ). For the  $\text{C}_3\text{H}_8$  molecules an uptake in line with the single component isotherms is recorded at this pressure (1.1  $\text{cm}^3(\text{STP})/\text{g}$  compared to 1.4  $\text{cm}^3(\text{STP})/\text{g}$  during single component adsorption). In the last measurement (Figure S9(d)), both partial pressures are above the gate opening pressure, which leads to uptakes of 56.5  $\text{cm}^3(\text{STP})/\text{g}$  for  $\text{CO}_2$  and 3.4  $\text{cm}^3(\text{STP})/\text{g}$  for  $\text{C}_3\text{H}_8$ . The value for  $\text{CO}_2$  is close to the uptake found for single component adsorption at the respective pressure, the  $\text{C}_3\text{H}_8$  value on the other hand, is substantially lower than for the single component adsorption (30.2  $\text{cm}^3(\text{STP})/\text{g}$  at similar pressures). It seems as if the cooperative effect found for this gas mixture is not as strong as in the case of  $\text{CO}_2/\text{C}_2\text{H}_6$ .  $\text{C}_3\text{H}_8$  is barely co-adsorbed, after the phase transition is initiated by  $\text{CO}_2$ . When the  $\text{C}_3\text{H}_8$  pressure is above the respective phase transition pressure, also much lower uptakes are found than in the single component cases. This might either be due to the sterical bulk of the adsorbate (good adsorption sites less accessible) or the much lower adsorption affinity of the framework towards  $\text{C}_3\text{H}_8$  compared to  $\text{CO}_2$ .

A depiction of  $\text{CO}_2/\text{C}_3\text{H}_8$  in a range from 0-100 kPa to clarify the  $\text{C}_3\text{H}_8$  uptakes at low pressures is shown in Figure S 10.

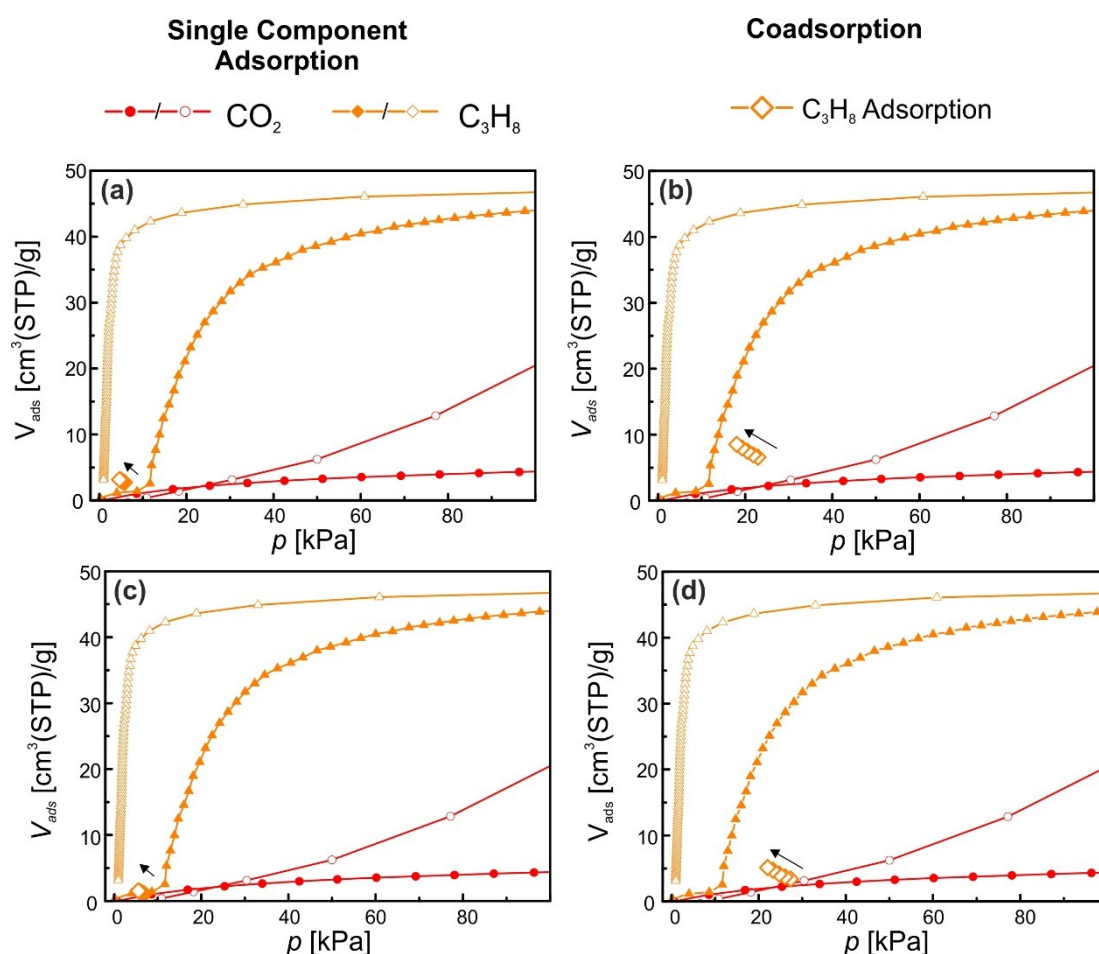

Figure S 10: Depiction of the excess single component and co-adsorption measurements of material 3, depicted in a range from 0 - 100 kPa. Red circles and orange triangles represent  $\text{CO}_2$  and  $\text{C}_3\text{H}_8$  single component adsorption isotherms.  $\text{CO}_2$  and  $\text{C}_3\text{H}_8$  fractions of the co-adsorption experiments are shown in red and orange, respectively. Total adsorption is shown in green.

In the following the selectivity coefficients for the CO<sub>2</sub>/C<sub>3</sub>H<sub>8</sub> coadsorption measurements are listed for the first pressure point.

Table 1: Selectivity coefficients calculated from the molar fractions of the binary mixture in the gas phase and adsorbed.<sup>a</sup>

| Figure | Material | Gas Mixture                                    | $p_e^b$ / kPa | Molar Fraction Gas Phase |             | Molar Fraction Adsorbed |             | Selectivity (CO <sub>2</sub> ) | Selectivity (Coadsorbate) |
|--------|----------|------------------------------------------------|---------------|--------------------------|-------------|-------------------------|-------------|--------------------------------|---------------------------|
|        |          |                                                |               | CO <sub>2</sub>          | Coadsorbate | CO <sub>2</sub>         | Coadsorbate |                                |                           |
| S 9(a) | 3        | CO <sub>2</sub> /C <sub>3</sub> H <sub>8</sub> | 286.63        | 0.98                     | 0.02        | 0.87                    | 0.13        | 0.14                           | 7.32                      |
| S 9(b) | 3        | CO <sub>2</sub> /C <sub>3</sub> H <sub>8</sub> | 299.25        | 0.92                     | 0.08        | 0.78                    | 0.22        | 0.31                           | 3.24                      |
| S 9(c) | 3        | CO <sub>2</sub> /C <sub>3</sub> H <sub>8</sub> | 540.17        | 0.99                     | 0.01        | 0.98                    | 0.02        | 0.49                           | 2.02                      |
| S 9(d) | 3        | CO <sub>2</sub> /C <sub>3</sub> H <sub>8</sub> | 568.01        | 0.96                     | 0.04        | 0.91                    | 0.09        | 0.42                           | 2.37                      |

<sup>a</sup> data is from 1<sup>st</sup> equilibrium point. <sup>b</sup> equilibration pressure of the gas mixture.

## S9 Physical Parameters of CO<sub>2</sub>, N<sub>2</sub>, CH<sub>4</sub>, C<sub>2</sub>H<sub>6</sub>, and C<sub>3</sub>H<sub>8</sub>

Table S1: Summary of the kinetic diameter, polarizability and quadrupole moment of CO<sub>2</sub>, N<sub>2</sub>, CH<sub>4</sub>, C<sub>2</sub>H<sub>6</sub> and C<sub>3</sub>H<sub>8</sub>.<sup>1</sup>

| Adsorbates     | Sum Formula                   | Kinetic Diameter | Polarizability                                | Quadrupole Moment                     |
|----------------|-------------------------------|------------------|-----------------------------------------------|---------------------------------------|
| Carbon dioxide | CO <sub>2</sub>               | 3.3 Å            | $29.11 \times 10^{25}/\text{cm}^3$            | $4.30 \times 10^{26}/\text{esu cm}^2$ |
| Nitrogen       | N <sub>2</sub>                | 3.64 Å           | $17.403 \times 10^{25}/\text{cm}^3$           | $1.52 \times 10^{26}/\text{esu cm}^2$ |
| Methane        | CH <sub>4</sub>               | 3.758 Å          | $25.93 \times 10^{25}/\text{cm}^3$            | 0                                     |
| Ethane         | C <sub>2</sub> H <sub>6</sub> | 4.443 Å          | $44.3\text{-}44.7 \times 10^{25}/\text{cm}^3$ | $0.65 \times 10^{26}/\text{esu cm}^2$ |
| Propane        | C <sub>3</sub> H <sub>8</sub> | 5.118 Å          | $62.9\text{-}63.7 \times 10^{25}/\text{cm}^3$ | -                                     |



## S10 References

- (1) Li, J.-R.; Kuppler, R. J.; Zhou, H.-C. *Chem. Soc. Rev.* **2009**, *38*, 1477.
